# Supplementary material
Source: PubMed Central journal article supplement (PMC8802279)
Supplement: 41569_2021_668_MOESM1_ESM.pdf [file 41569_2021_668_MOESM1_ESM.pdf]

**Supplementary information**

---

**Therapeutic strategies targeting  
inflammation and immunity in  
atherosclerosis: how to proceed?**

---

In the format provided by the  
authors and unedited

Supplementary Table 1 | Immunotherapies without beneficial effects on inflammation or event rates in cardiovascular disease in clinical trials

| Trial (year)              | Drug                                                       | Drug target                                        | Design                                                  | Patient cohort                                                                                                                | Primary end point                                                                                  | Main outcomes                                                                                                                                  | Ref.         |
|---------------------------|------------------------------------------------------------|----------------------------------------------------|---------------------------------------------------------|-------------------------------------------------------------------------------------------------------------------------------|----------------------------------------------------------------------------------------------------|------------------------------------------------------------------------------------------------------------------------------------------------|--------------|
| CIRT (2019)               | Methotrexate                                               | Dihydrofolate reductase inhibitor                  | Phase III, randomized, double-blind, placebo-controlled | 4,786 patients with previous MI or multivessel coronary artery disease who additionally had either T2DM or metabolic syndrome | Composite of nonfatal myocardial infarction, nonfatal stroke, or cardiovascular death              | No effect on cardiovascular events compared with placebo and did not reduce plasma IL-1 $\beta$ , IL-6 or CRP levels                           | <sup>1</sup> |
| SILENCE (2015)            | Liposomal nanoparticle encapsulating prednisolone (LN-PLP) | Delivery to macrophages in atherosclerotic plaques | Phase II, randomized, double-blind, placebo-controlled  | 30 patients with documented history of CVD                                                                                    | FDG-PET CT to identify patients with marked arterial wall inflammation                             | Short-term LN-PLP treatment did not reduce arterial wall inflammation measured by FDG-PET CT                                                   | <sup>2</sup> |
| Bissonnette et al. (2017) | Adalimumab                                                 | Tumour necrosis factor antagonist                  | Phase II, randomized, double-blind, placebo-controlled  | 107 patients with psoriasis                                                                                                   | Arterial inflammation detected by PET-CT                                                           | No difference in vascular inflammation after 16 weeks                                                                                          | <sup>3</sup> |
| GLACIER (2015)            | MLDL1278A                                                  | Anti-oxidized-LDL antibody                         | Phase II, randomized, double-blind, placebo-controlled  | 147 patients with evidence of vascular inflammation, as quantified by FDG-PET-CT                                              | Change in vascular inflammation, measured by FDG-PET-CT and hsCRP levels at 12 weeks               | No difference in vascular inflammation on FDG-PET-CT and no significant differences in hsCRP levels with MLDL1278A versus placebo              | <sup>4</sup> |
| Elkhwad et al. (2012)     | Losmapimod                                                 | p38 inhibition                                     | Phase II, randomized, placebo-controlled                | 99 patients with atherosclerosis who were receiving stable statin therapy                                                     | Vascular inflammation measured by FDG-PET-CT and hsCRP                                             | No significant changes in vascular inflammation and hsCRP levels                                                                               | <sup>5</sup> |
| SOLSTICE (2014)           |                                                            |                                                    | Phase II, randomized, placebo-controlled                | 526 patients with NSTEMI                                                                                                      | hsCRP and infarct size                                                                             | hsCRP levels at 72 h were lower in the losmapimod group than in the placebo group but were similar at 12 weeks. No differences in infarct size | <sup>6</sup> |
| LATITUDE-TIMI 60 (2016)   |                                                            |                                                    | Phase III, randomized, double-blind, placebo-controlled | 3,505 patients with acute MI                                                                                                  | Cardiovascular death, MI or severe recurrent ischaemia requiring urgent coronary revascularization | No reduction in the risk of major ischaemic cardiovascular events                                                                              | <sup>7</sup> |

ACS, acute coronary syndrome; FDG, fluorodeoxyglucose; hsCRP, high-sensitivity C-reactive protein; CVD, cardiovascular disease; LDL-C, LDL-cholesterol; MI, myocardial infarction; NSTEMI, non-ST-segment elevation myocardial infarction; T2DM, type 2 diabetes mellitus.

## References

1. Ridker, P. M. et al. Low-dose methotrexate for the prevention of atherosclerotic events. *N. Engl. J. Med.* **380**, 752–762 (2019).
2. van der Valk, F. M. et al. Prednisolone-containing liposomes accumulate in human atherosclerotic macrophages upon intravenous administration. *Nanomedicine Nanotechnology, Biol. Med.* **11**, 1039–1046 (2015).
3. Bissonnette, R. et al. TNF- $\alpha$  antagonist and vascular inflammation in patients with psoriasis vulgaris: a randomized placebo-controlled study. *J. Invest. Dermatol.* **137**, 1638–1645 (2017).
4. Lehrer Graiwer, J. et al. FDG-PET imaging for oxidized LDL in stable atherosclerotic disease: A phase II study of safety, tolerability, and anti-inflammatory activity. *JACC: Cardiovascular Imaging* vol. 8 493–494 (2015).
5. Elkhawad, M. et al. Effects of p38 mitogen-activated protein kinase inhibition on vascular and systemic inflammation in patients with atherosclerosis. *JACC Cardiovasc. Imaging* **5**, 911–922 (2012).
6. Newby, L. K. et al. Losmapimod, a novel p38 mitogen-activated protein kinase inhibitor, in non-ST-segment elevation myocardial infarction: a randomised phase 2 trial. *Lancet* **384**, 1187–1195 (2014).
7. O'Donoghue, M. L. et al. Effect of losmapimod on cardiovascular outcomes in patients hospitalized with acute myocardial infarction: A randomized clinical trial. *J. Am. Med. Assoc.* **315**, 1591–1599 (2016).
